# Supplementary material
Source: PubMed Central journal article supplement (PMC3586752)
Supplement: NIHMS418617-supplement-03.pdf [file NIHMS418617-supplement-03.pdf]

**Supplementary Figures:**

**Supplementary Fig. 1.** [<sup>3</sup>H]Ketanserin specific binding in wild type (WT) and 5-HT<sub>2A</sub>-KO mouse frontal cortex membrane preparations (n=6). All values represent means±SEM.

**Supplementary Fig. 2.** Schematic representation of agonist, antagonist, and inverse agonist binding to different functional states of the receptor. Agonists bind with higher affinity to the active conformation of the receptor (R\*), whereas inverse agonists preferentially bind and stabilize the receptor in the inactive state (R). Neutral antagonists bind both coupled and uncoupled forms of the receptor with essentially identical affinity. Non-hydrolyzable GTP analogs, such as Gpp(NH)p or GTPγS, stabilize the transition state of Gα for GTP hydrolysis. This uncouples receptor-G protein complexes shifting the equilibrium to the inactive (R) state.

**Supplementary Fig. 3. (A)** [<sup>3</sup>H]Ketanserin specific binding (2 nM) displacement curves by DOI in mouse frontal cortex in the presence or in the absence of GDP/GTPγS. Displacement curves are statistically different in the presence and in the absence of GDP/GTPγS (F[5,208]=2.59, *p*<0.05, n=4-6). In the presence of GDP/GTPγS, the triphasic displacement curve became monophasic. Vehicle buffer: pK<sub>i-high</sub>, -8.94±0.46; fraction high, 0.11±0.04; pK<sub>i-medium</sub>, -7.00±0.19; fraction medium, 0.66±0.09; pK<sub>i-low</sub>, -5.65±0.55 (F[2,155]=3.81, *p*<0.05). GDP/GTPγS buffer: pK<sub>i</sub>, -6.92±0.06 (F[2,23]=2.01, *p*>0.05). **(B)** [<sup>3</sup>H]Ketanserin specific binding (2 nM) displacement curves by LSD in mouse frontal cortex in the presence or in the absence of GDP/GTPγS. Displacement curves are statistically different in the presence and in the absence of GDP/GTPγS (F[3,50]=149.6, *p*<0.001, n=4). In the presence of GDP/GTPγS, the monophasic displacement curve of [<sup>3</sup>H]ketanserin binding by LSD is shifted to the right. Vehicle buffer: pK<sub>i</sub>, -9.01±0.07 (F[2,26]=6.16, *p*>0.05). GDP/GTPγS buffer: -5.59±0.06 (F[2,23]=0.09, *p*>0.05). All values represent means±SEM.
