# Supplementary material
Source: PubMed Central journal article supplement (PMC3586752)

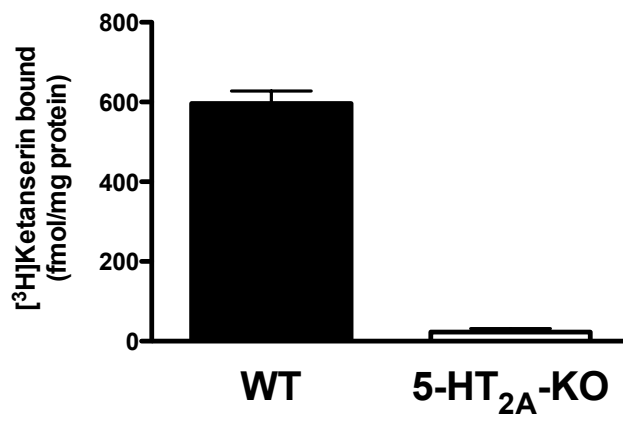

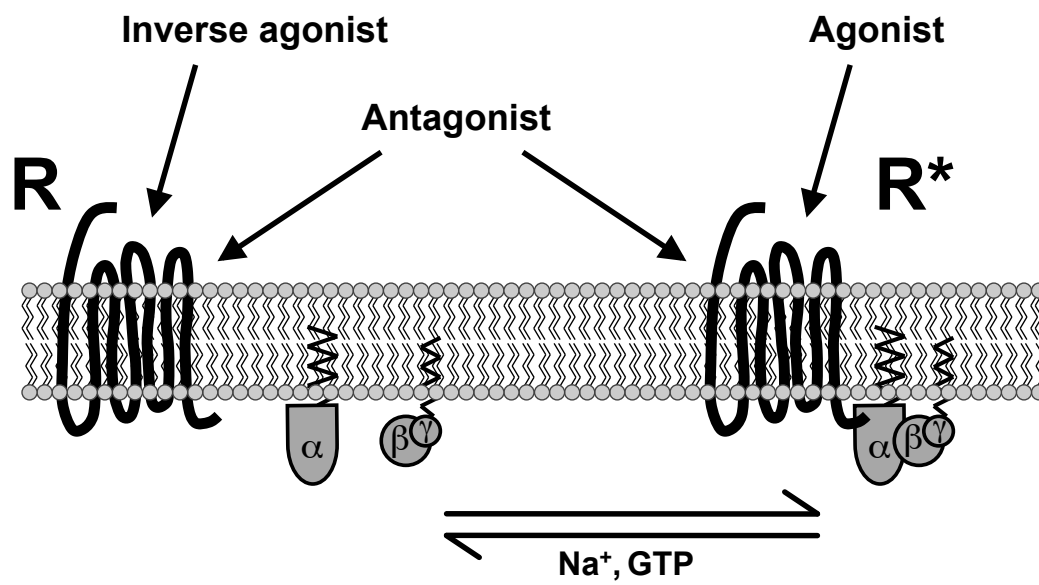

Muguruza et al (Supplementary Fig. 2)

**A**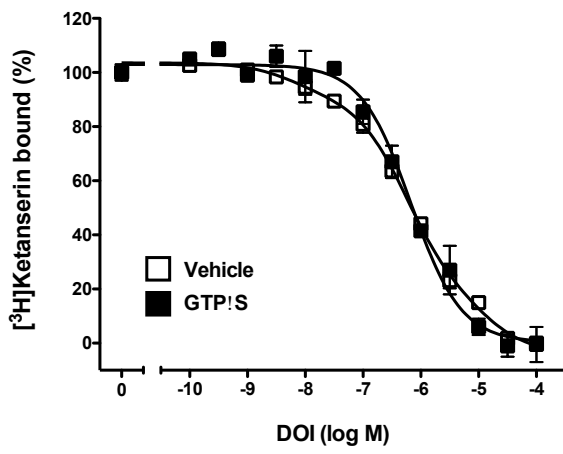**B**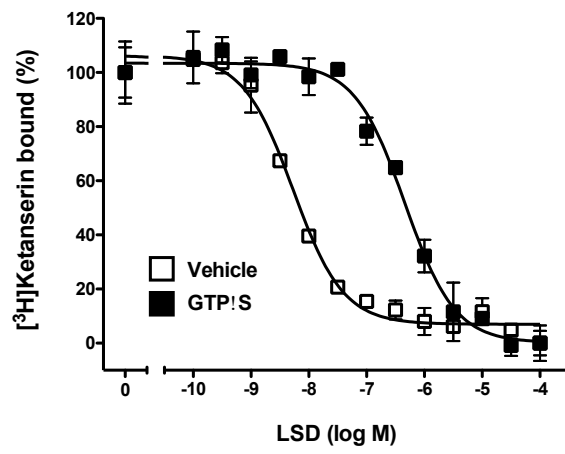

Supplement: NIHMS418617-supplement-02.pdf [file NIHMS418617-supplement-02.pdf]
